# Supplementary material for: ﻿Unveiling species diversity within early-diverging fungi from China I: three new species of Backusella (Backusellaceae, Mucoromycota)
Source: PubMed Central journal article supplement (PMC11494212; doi:10.3897/mycokeys.109.126029), 2024-10-14

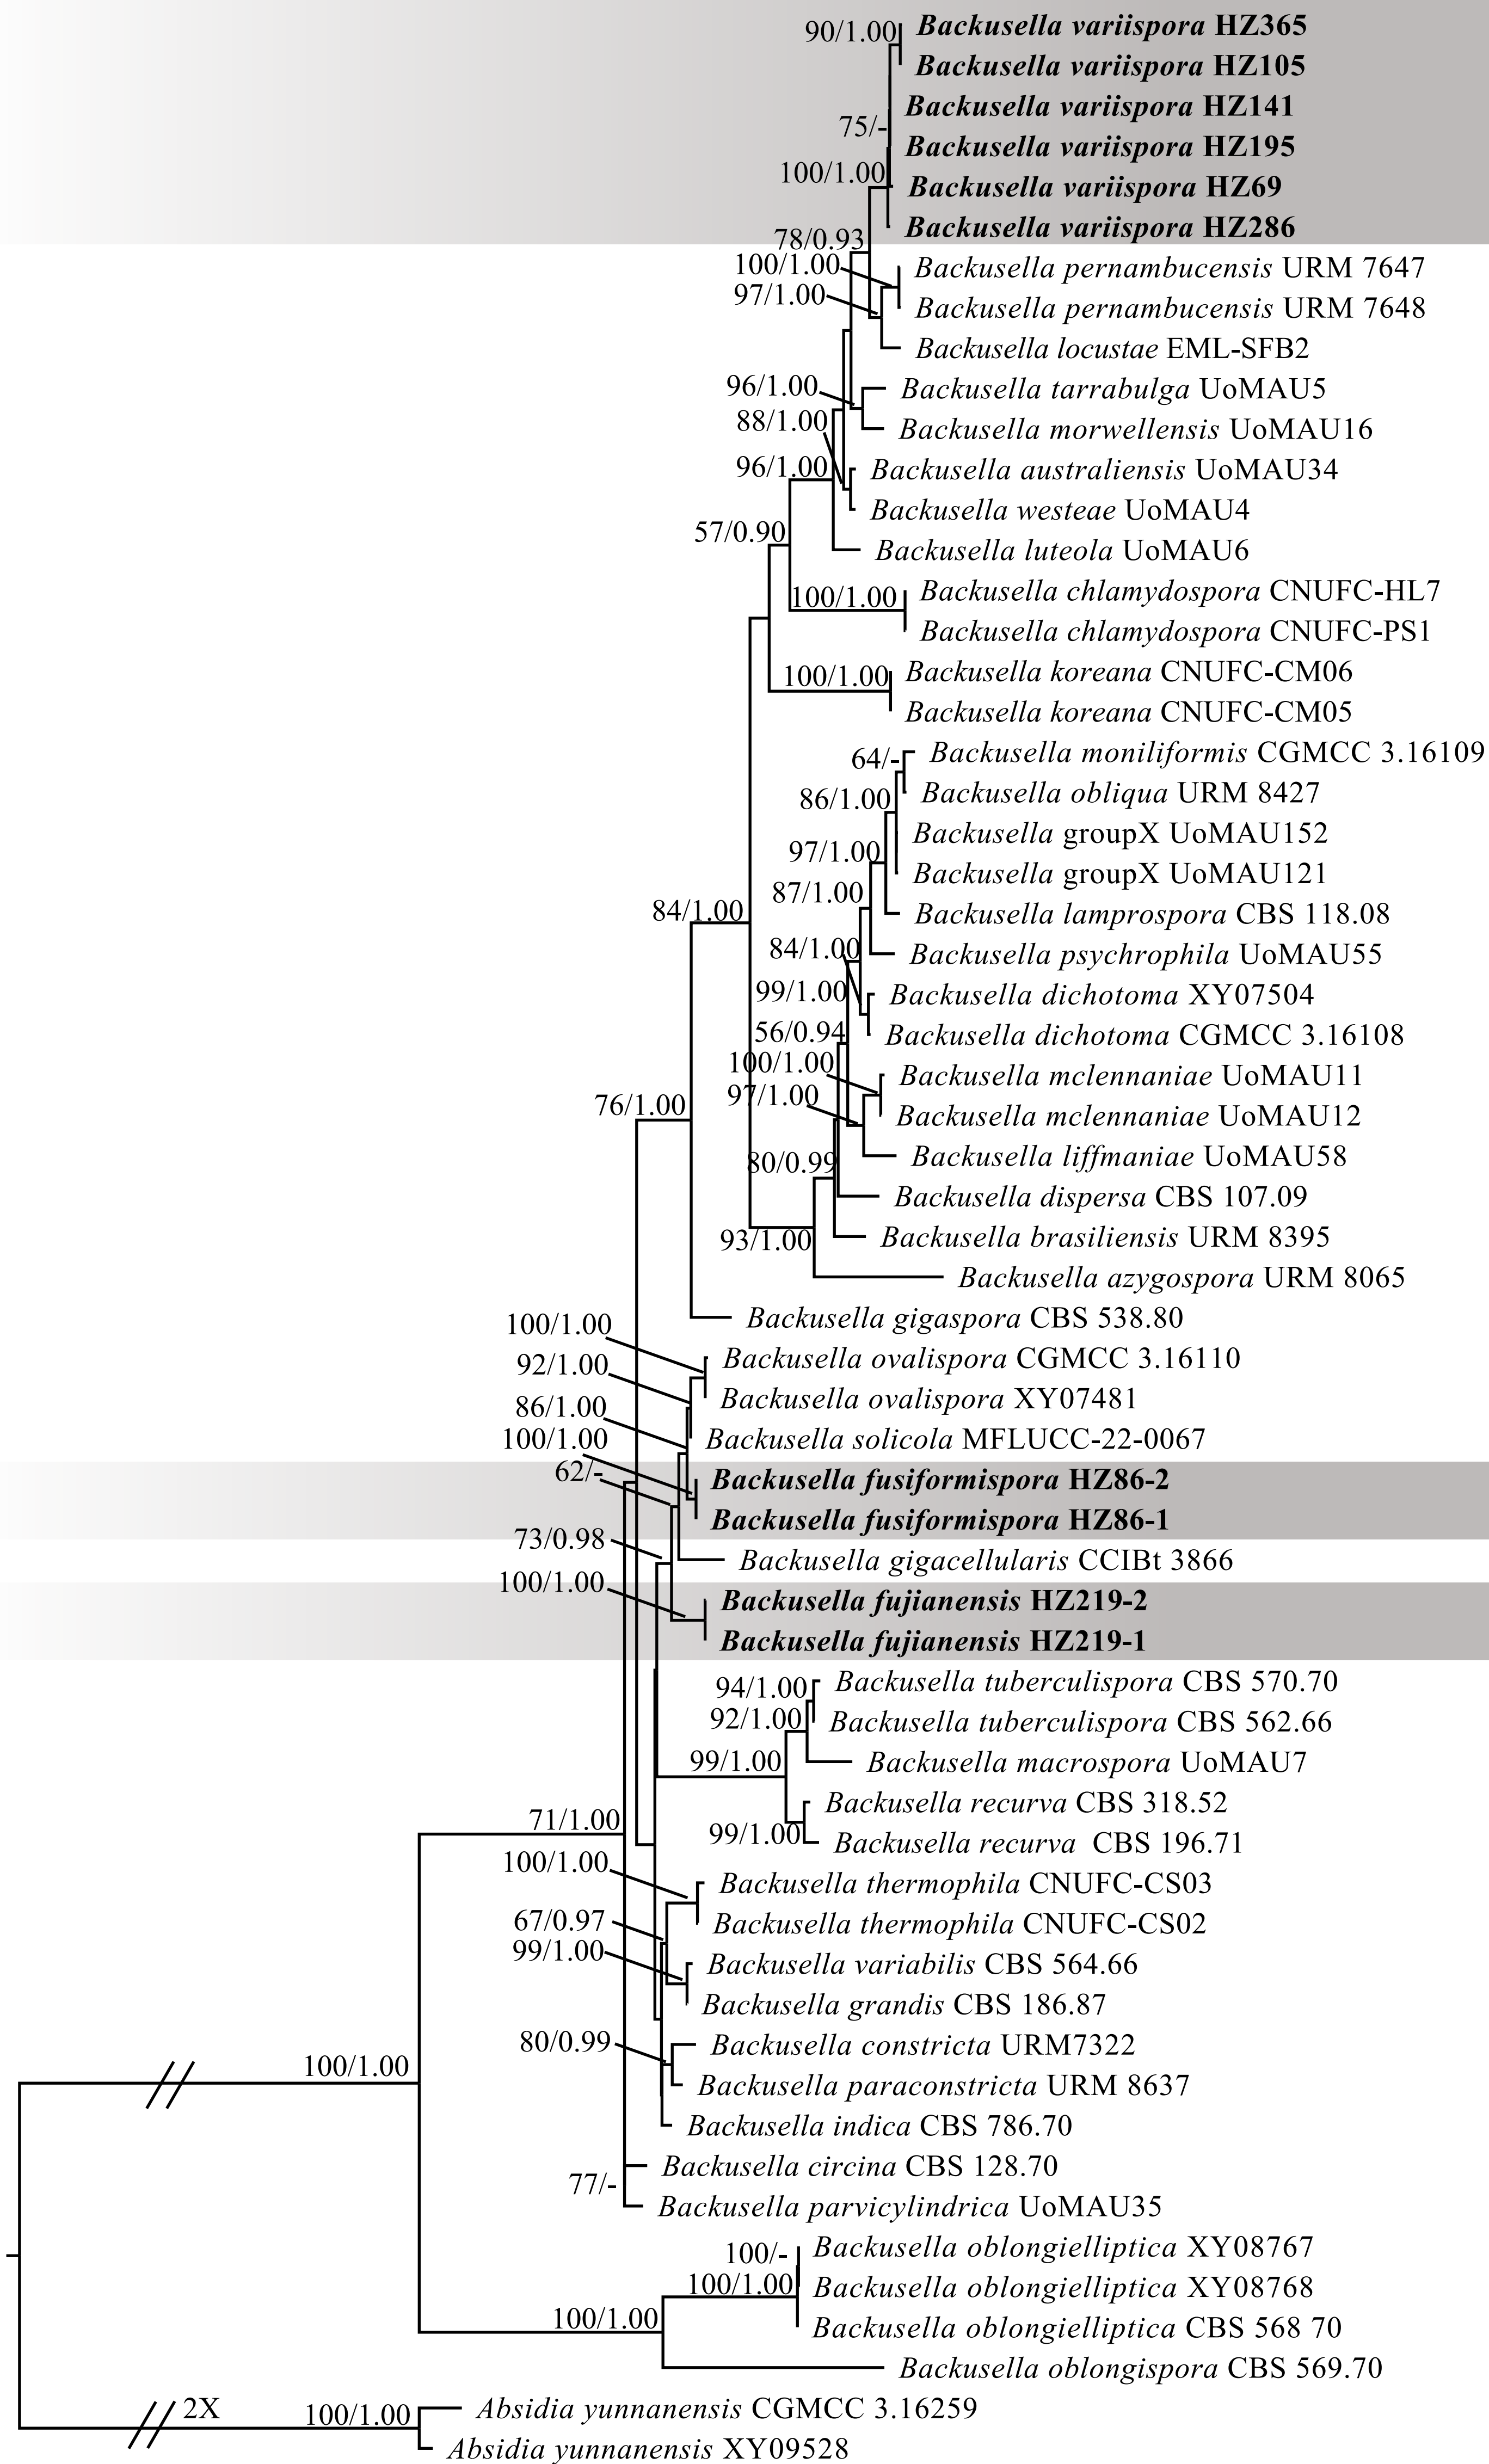

Supplement: mycokeys-109-285-s003.pdf [file mycokeys-109-285-s003.pdf]
